# Supplementary material for: Methionine adenosyltransferase2A inhibition restores metabolism to improve regenerative capacity and strength of aged skeletal muscle
Source: PubMed Central journal article supplement (PMC9935517; doi:10.1038/s41467-023-36483-3), 2023-02-16
Supplement: 41467_2023_36483_MOESM2_ESM.pdf [file 41467_2023_36483_MOESM2_ESM.pdf]

## Description of Additional Supplementary Files

**Supplementary Movie 1:** Spontaneous contraction in myotubes derived from wild type mouse myoblast (WM) cells in vitro.

**Supplementary Movie 2:** Spontaneous contraction in myotubes derived from LAKI mouse myoblast (LM) cells in vitro.

**Supplementary Movie 3:** Spontaneous contraction in myotubes derived from LAKI-NANOG mouse myoblast (LMN) cells in vitro.

**Supplementary Movie 4:** Spontaneous contraction in myotubes derived from LAKI mouse myoblast with shMat2a (LM+shMat2a) cells in vitro.
